# Supplementary material
Source: PubMed Central journal article supplement (PMC4249077)
Supplement: JVI.01757-14_zjv999099708so1.pdf [file JVI.01757-14_zjv999099708so1.pdf]

**Table S1.** List of antibodies used for characterization of mucosal mononuclear and epithelial cells in rhesus macaques.

| <b>Antibody</b>                               | <b>Isotype</b>        | <b>Clone</b> | <b>Working Dilution</b> | <b>Source</b>   | <b>Method Used</b> |
|-----------------------------------------------|-----------------------|--------------|-------------------------|-----------------|--------------------|
| Anti-human CD3 Pacific Blue                   | Mouse IgG1            | SP34-2       | 1:2                     | BD Biosciences  | FC                 |
| Anti-human CD3                                | Rabbit polyclonal     | -            | 1:100                   | Biocare Medical | IF                 |
| Anti-human CD4 APCH7                          | Mouse IgG1            | L200         | 1:1                     | BD Biosciences  | FC                 |
| Anti-human CD11c                              | Mouse IgG1            | 3.9          | 1:50                    | Biologend       | IF                 |
| Anti-human CD45                               | Mouse IgG1            | D058-1283    | 1:50                    | BD Biosciences  | IF                 |
| Anti-human CD45 APC                           | Mouse IgG1            | MB4-6D6      | 1:11                    | Miltenyi Biotec | FC                 |
| Anti-human CD68                               | Mouse IgG1            | KP1          | 1:50                    | Dako            | IF                 |
| Anti-human CD79a                              | Mouse IgG1            | HM47         | 1:100                   | BD Biosciences  | IF                 |
| Anti-human CD210 (IL10R)                      | Rat IgG2a             | 3F9          | 1:100                   | Biologend       | IF                 |
| Anti-human CD210 (IL10R) PE                   | Rat IgG2a             | 3F9          | 1:1                     | Biologend       | FC                 |
| Anti-human IL10                               | Rat IgG1              | JES3-9D7     | 1:20                    | Biologend       | IF                 |
| Anti-human IL10 PE-Cy7                        | Rat IgG1              | JES3-9D7     | 1:1                     | Biologend       | FC                 |
| Anti-human IFN $\gamma$                       | Mouse IgG1            | 4S.B3        | 1:20                    | Biologend       | IF                 |
| Anti-human IFN $\gamma$ PerCP-Cy5.5           | Mouse IgG1            | 4S.B3        | 1: 10                   | BD Biosciences  | FC                 |
| Anti-phospho-STAT3                            | Rabbit IgG            | D3A7         | 1:50                    | Cell Signaling  | IF                 |
| Anti-human TNF $\alpha$                       | Mouse IgG1            | MAB11        | 1:20                    | Biologend       | IF                 |
| Anti-human TNF $\alpha$ Alexa Flour 700       | Mouse IgG1            | Mab11        | 1:2                     | BD Biosciences  | FC                 |
| Active Caspase 3                              | Rabbit polyclonal     | -            | 1:500                   | Abcam           | IF                 |
| Anti-human ZO-1                               | Mouse IgG1            | ZO1-1A12     | 1:30                    | Invitrogen      | IF                 |
| Anti-cow Cytokeratin, Wide Spectrum Screening | Rabbit polyclonal IgG | -            | 1:500                   | Dako            | IF                 |

---

|                                                    |            |         |      |                    |    |
|----------------------------------------------------|------------|---------|------|--------------------|----|
| IOPath <sup>®</sup> Cytokeratin-<br>Large Spectrum | Mouse IgG1 | KL1     | 1:50 | Beckman<br>Coulter | IF |
| Anti-Human Epithelial<br>Antigen FITC              | Mouse IgG1 | Ber-EP4 | 1:2  | Dako               | FC |

---

Note: Before all staining, the dilution of the respective antibodies was determined via serial dilution experiments. IF and FC represent immunofluorescence and flow cytometry respectively.

**Table S2:** Percentages of active caspase-3 positive enterocytes detected in normal and acute SIV infected rhesus macaques.

| <b>Category</b> | <b>Animal Number</b> | <b>Tissue</b> | <b>Days post SIV infection</b> | <b>AC-3+ enterocytes (%) (mean <math>\pm</math> standard errors)</b> |               |
|-----------------|----------------------|---------------|--------------------------------|----------------------------------------------------------------------|---------------|
| Normal          | GB61                 | Colon         | -                              | 1.0 $\pm$ 0.3                                                        |               |
|                 | GJ06                 | Colon         | -                              | 0.5 $\pm$ 0.1                                                        |               |
|                 | GN70                 | Colon         | -                              | 1.1 $\pm$ 0.2                                                        |               |
|                 | GN74                 | Colon         | -                              | 0.9 $\pm$ 0.1                                                        |               |
|                 | FF15                 | Colon         | -                              | 0.6 $\pm$ 0.1                                                        |               |
|                 | FF23                 | Colon         | -                              | 0.3 $\pm$ 0.1                                                        |               |
|                 | GB61                 | Jejunum       | -                              | 2.3 $\pm$ 0.7                                                        |               |
|                 | GJ06                 | Jejunum       | -                              | 0.2 $\pm$ 0.1                                                        |               |
|                 | GN70                 | Jejunum       | -                              | 3.2 $\pm$ 1.1                                                        |               |
|                 | GN74                 | Jejunum       | -                              | 1.8 $\pm$ 0.8                                                        |               |
|                 | FF15                 | Jejunum       | -                              | 0.2 $\pm$ 0.1                                                        |               |
|                 | FF23                 | Jejunum       | -                              | 0.4 $\pm$ 0.1                                                        |               |
|                 | Acute SIV Infection  | AV63          | Colon                          | 8                                                                    | 0.8 $\pm$ 0.2 |
|                 |                      | AV85          | Colon                          | 21                                                                   | 4.1 $\pm$ 0.7 |
| AV91            |                      | Colon         | 10                             | 0.7 $\pm$ 0.3                                                        |               |
| BA17            |                      | Colon         | 13                             | 2.3 $\pm$ 0.5                                                        |               |
| BA57            |                      | Colon         | 8                              | 1.3 $\pm$ 0.2                                                        |               |
| BN37            |                      | Colon         | 21                             | 0.5 $\pm$ 0.1                                                        |               |
| HN29            |                      | Colon         | 10                             | 1.7 $\pm$ 0.2                                                        |               |
| M992            |                      | Colon         | 13                             | 2.0 $\pm$ 0.4                                                        |               |
| AV63            |                      | Jejunum       | 8                              | 10.9 $\pm$ 1.5                                                       |               |
| AV85            |                      | Jejunum       | 21                             | 18.0 $\pm$ 3.0                                                       |               |
| AV91            |                      | Jejunum       | 10                             | 10.5 $\pm$ 1.9                                                       |               |
| BA17            |                      | Jejunum       | 13                             | 8.6 $\pm$ 3.2                                                        |               |
| BA57            |                      | Jejunum       | 8                              | 11.5 $\pm$ 4.3                                                       |               |
| BN37            |                      | Jejunum       | 21                             | 14.3 $\pm$ 3.8                                                       |               |
| HN29            | Jejunum              | 10            | 6.8 $\pm$ 1.2                  |                                                                      |               |
| M992            | Jejunum              | 13            | 11.0 $\pm$ 3.5                 |                                                                      |               |

## SUPPLEMENTARY FIGURES:

**Figure S1:** Interferon gamma ( $\text{IFN}\gamma$ ) expression of  $\text{CD3}^+$  T-cells and  $\text{CD3}^-$  lymphocytes in jejunum lamina propria mononuclear cells detected by flow cytometry from a representative macaque at day 0 and 21 days post  $\text{SIV}_{\text{MAC251}}$  infection. (A) Cells were gated first on singlets, lymphocytes, followed by live cells and then on  $\text{CD3}^+$  T-cells and  $\text{CD3}^-$  lymphocytes. (B) The percentages of total  $\text{IFN}\gamma$  are shown in each upper box of each plot of  $\text{CD3}^+$  T-cells and  $\text{CD3}^-$  lymphocytes. (C) The percentages for  $\text{IFN}\gamma$  are shown for  $\text{CD3}^+$  T-cells and  $\text{CD3}^-$  lymphocytes (open histograms) along with fluorescence minus controls (filled histograms).

**Figure S2.** Linear regression analysis was performed comparing mean percentages of active caspase-3+ enterocytes and plasma viral load in acute (A & C) and chronic (B & D) SIV infected macaques. Note there is an inverse correlation between apoptotic enterocytes and plasma viral load during acute phase of infection in both colon (A, n=8) and jejunum (C, n=8). Interestingly, a positive correlation is shown between apoptotic enterocytes and plasma viral load during chronic infection in both colon (B) and jejunum (D) tissues (n=7). However, these data were not statistically significant.

**Figure S3.** Jejunum villus height, crypt length, and villus to crypt ratio, and colon crypt length and breadth in both normal, and SIV-infected macaques. Differences in jejunum villus height (A), jejunum crypt length (B), jejunum villus:crypt ratios (C), colon crypt length (D), and colon crypts breadth (E) with means  $\pm$  standard errors were plotted from normal, and SIV-infected animals. Increased jejunum and decreased colon crypt length were detected in acute (n=6) and chronic (n=6) SIV infected macaques compared

to uninfected controls (n=7). A minimum of 12 to 20 fields from each animal was considered for morphometric analysis. Asterisks indicate statistically significant differences between the respective animal groups (\* denotes  $p < 0.005$  and \*\* denotes  $p < 0.0001$ ).

**Figure S4.** Detection of p-STAT3 positive cells in normal and SIV infected jejunum tissues. Phosphorylated-STAT3 positive cells were detected in uninfected normal (A), acute (B) and chronic (C) SIV-infected macaques by immunohistochemistry staining using anti-pSTAT3 monoclonal antibodies with nuclear fast red counterstain. (D) Isotype control developed with Mach 3 Rabbit AP-Polymer staining showed no positive brown staining in tissues. Black arrow denotes the presence of pSTAT3 positive cells (dark brown color), majority distributed in lamina propria region.

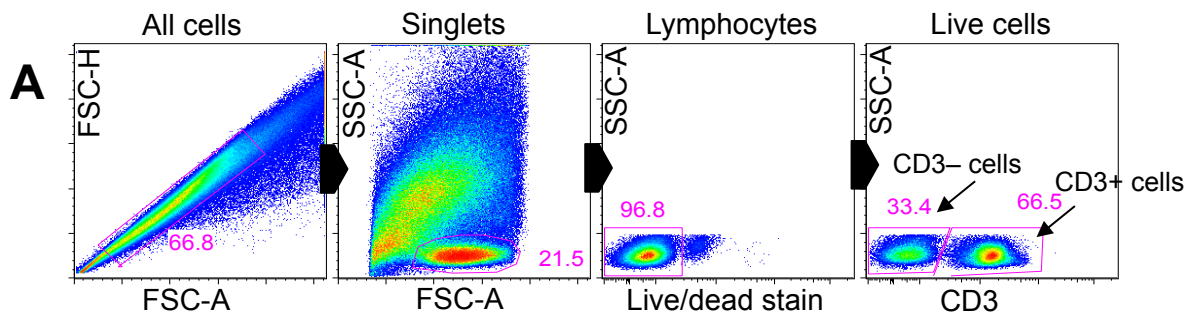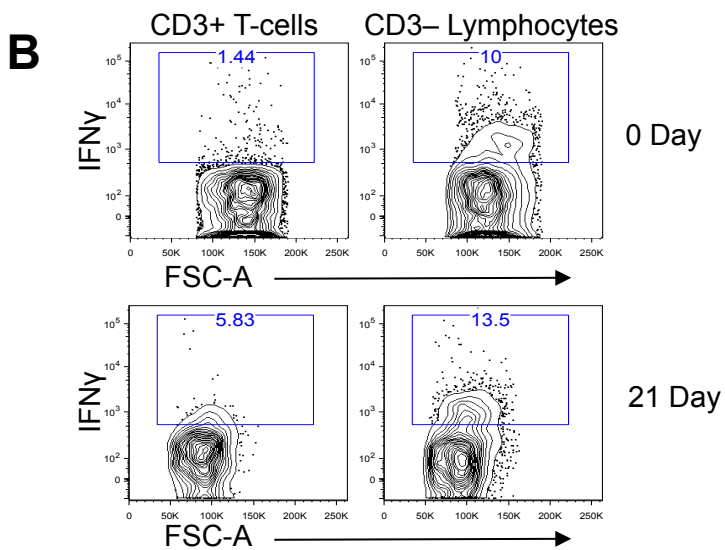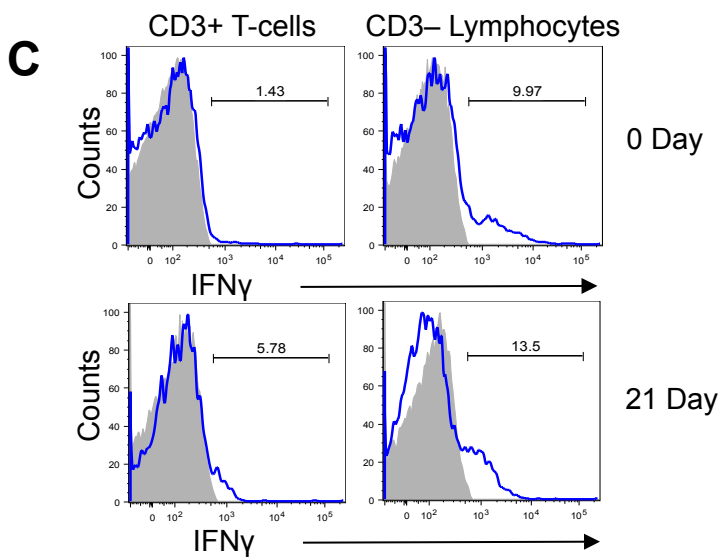

Figure S1

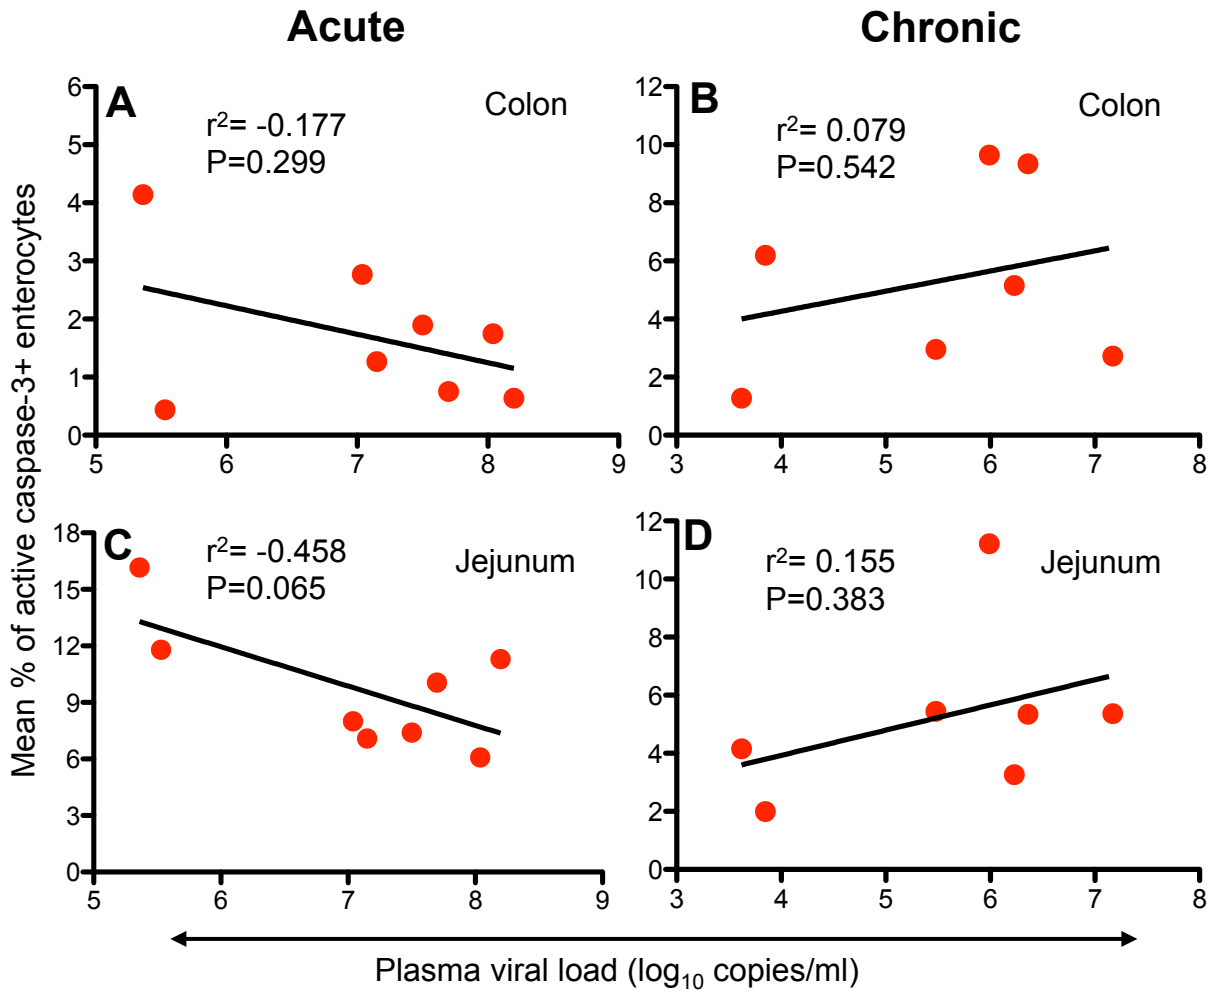

Figure S2

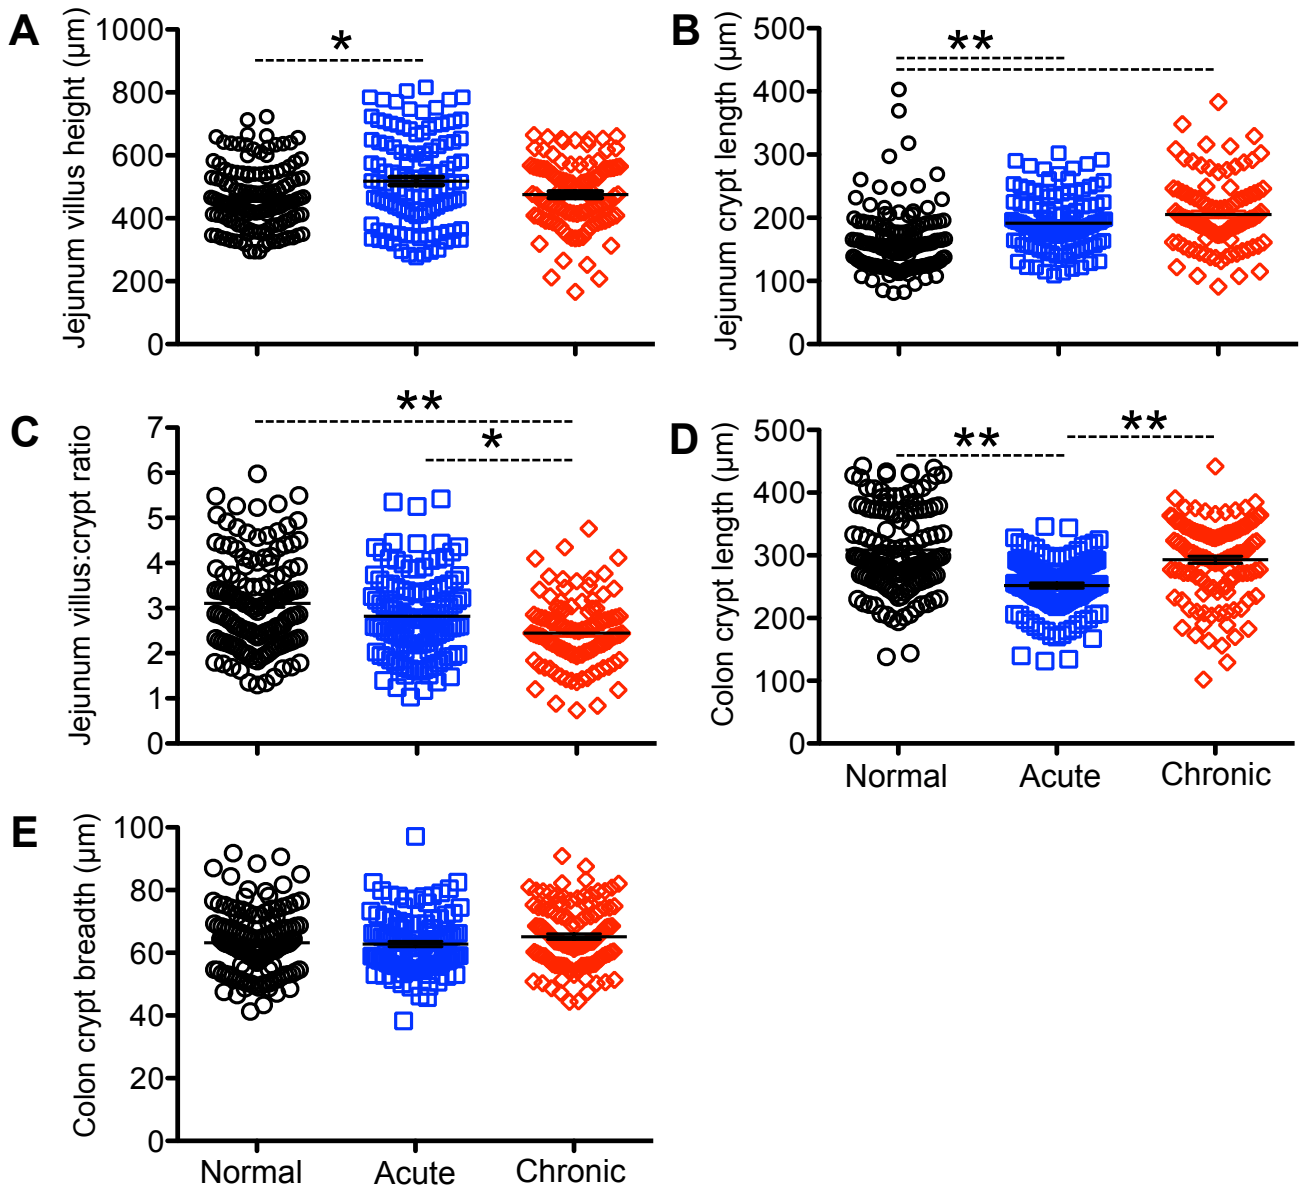

Figure S3



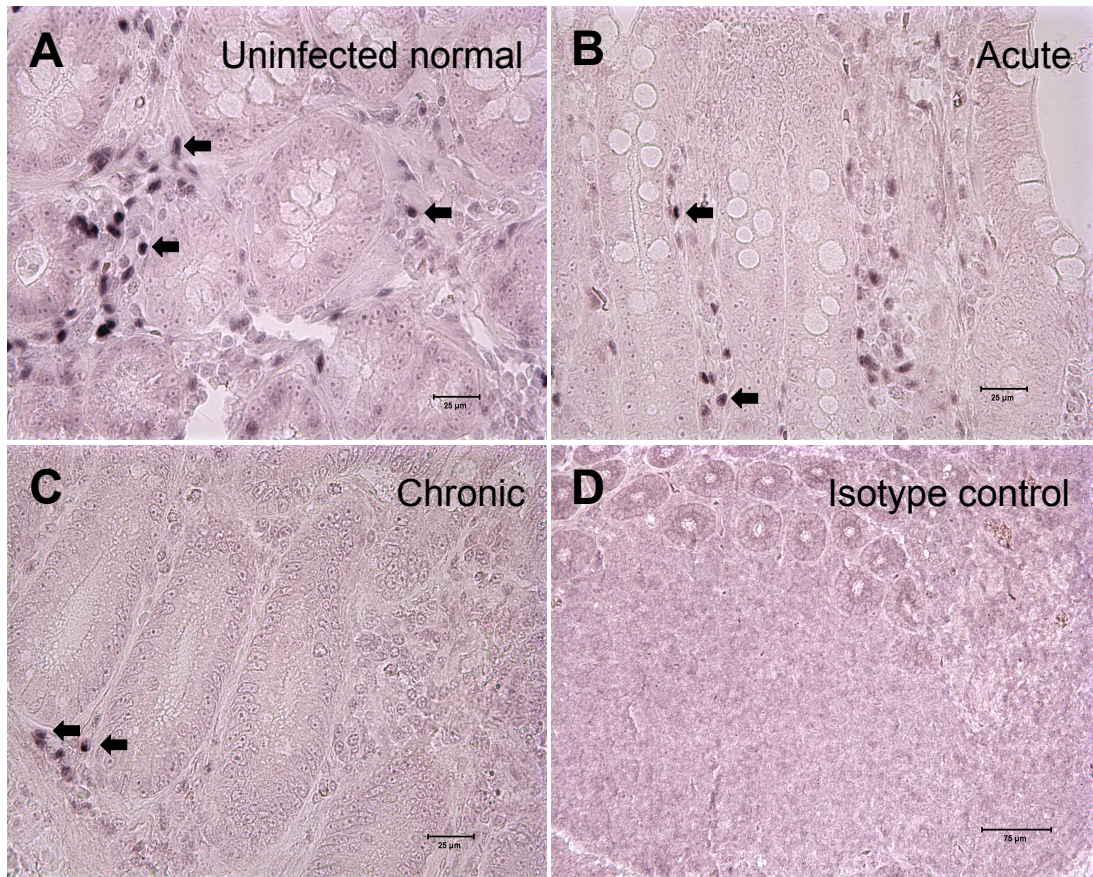

Figure S4
